# Supplementary material for: Change in the symptom profile treated as asthma – two cross-sectional studies twenty years apart
Source: Springer Nature journal article supplement (doi:10.1186/s12931-020-1308-3), 2020-02-03
Supplement: MOESM1 [file 17620430]

## ONLINE SUPPLEMENTARY MATERIAL

### Change in the symptom profile treated as asthma – two cross-sectional studies twenty years apart

Mihkel Pindus, Hans Orru, Rain Jõgi

ONLINE SUPPLEMENTARY TABLE S1 Crude and age- and sex-standardised prevalence's (%) of respiratory symptoms in ECRHS I and SOHOS study using 1993-year annual population data from Tartu, Estonia.

|                                   | ECRHS I 1993/94 |                             | SOHOS 2014/15 |                             |
|-----------------------------------|-----------------|-----------------------------|---------------|-----------------------------|
|                                   | Crude           | Age- & sex-<br>standardised | Crude         | Age- & sex-<br>standardised |
| Breathlessness while wheezing     | 7.7             | 7.7                         | 6.9           | 7.2                         |
| Wheeze without cold               | 12.7            | 12.7                        | 8.9           | 9.0                         |
| Waking with chest tightness       | 13.5            | 13.7                        | 13.5          | 12.7                        |
| Woken by attack of breathlessness | 7.8             | 7.9                         | 9.8           | 9.2                         |
| Woken by attack of cough          | 42.0            | 42.1                        | 36.9          | 34.7                        |
| Attack of asthma                  | 1.9             | 1.8                         | 3.5           | 3.9                         |
| Current asthma medication         | 0.7             | 0.6                         | 2.3           | 2.4                         |
| Nasal allergies                   | 17.7            | 17.8                        | 24.0          | 23.5                        |
| Current smokers                   | 45.7            | 45.9                        | 20.3          | 23.7                        |
| Ex-smokers                        | 12.0            | 12.0                        | 24.0          | 20.9                        |
| Asthma-related symptoms           | 5.1             | 5.1                         | 5.3           | 5.5                         |
| Asthma-related disorder           | 2.0             | 1.9                         | 4.2           | 4.5                         |

## Sensitivity analysis

ONLINE SUPPLEMENTARY TABLE S2 Difference in prevalence (%) of respiratory symptoms for early (<4 weeks) and late (>8 weeks) questionnaire respondents.

|                                   | ECRHS I   |          |                 | SOHOS     |          |                 |
|-----------------------------------|-----------|----------|-----------------|-----------|----------|-----------------|
|                                   | < 4 weeks | >8 weeks | <i>P</i> -value | < 4 weeks | >8 weeks | <i>P</i> -value |
| Breathlessness while wheezing     | 7.7       | 6.2      | 0.229           | 7.4       | 6.6      | 0.729           |
| Wheeze without cold               | 13.4      | 12.9     | 0.794           | 8.6       | 11.0     | 0.328           |
| Waking with chest tightness       | 12.7      | 13.3     | 0.726           | 11.3      | 14.3     | 0.284           |
| Woken by attack of breathlessness | 7.6       | 9.2      | 0.221           | 10.9      | 12.8     | 0.488           |
| Woken by attack of cough          | 40.5      | 40.5     | 0.993           | 34.0      | 40.0     | 0.136           |
| Attack of asthma                  | 1.4       | 1.4      | 0.929           | 4.7       | 3.1      | 0.333           |
| Current asthma medication         | 0.8       | 0.1      | <0.05           | 3.5       | 2.2      | 0.351           |
| Nasal allergies                   | 17.8      | 16.9     | 0.630           | 22.3      | 25.5     | 0.371           |

ONLINE SUPPLEMENTARY TABLE S3 Prevalence (%) of respiratory symptoms, attack of asthma and asthma medication use in women, men among non-smokers. \**p*<0.05 from Chi-square test.

|                                   | Sex     | Year  |      |
|-----------------------------------|---------|-------|------|
|                                   |         | Women | Men  |
| Breathlessness while wheezing     | 1993/94 | 6.9   | 3.5  |
|                                   | 2014/15 | 4.7   | 3.9  |
| Wheeze without cold               | 1993/94 | 6.3   | 5.3  |
|                                   | 2014/15 | 2.6*  | 5.8  |
| Waking with chest tightness       | 1993/94 | 16.1  | 8.4  |
|                                   | 2014/15 | 10.3* | 9.6  |
| Woken by attack of breathlessness | 1993/94 | 8.7   | 4.1  |
|                                   | 2014/15 | 6.3   | 9.6* |
| Woken by attack of cough          | 1993/94 | 37.5  | 28.3 |
|                                   | 2014/15 | 34.4  | 26.9 |
| Attack of asthma                  | 1993/94 | 2.0   | 1.7  |
|                                   | 2014/15 | 1.8   | 3.8  |
| Current asthma medication         | 1993/94 | 1.3   | 0.0  |
|                                   | 2014/15 | 2.1   | 3.2  |
| Nasal allergies                   | 1993/94 | 17.2  | 17.9 |
|                                   | 2014/15 | 25.9* | 20.7 |
| Asthma-related symptoms           | 1993/94 | 3.3   | 2.2  |
|                                   | 2014/15 | 1.6   | 3.9  |
| Asthma-related disorder           | 1993/94 | 2.2   | 1.7  |
|                                   | 2014/15 | 2.7   | 4.5  |

\**p*< 0.05 between surveys.
